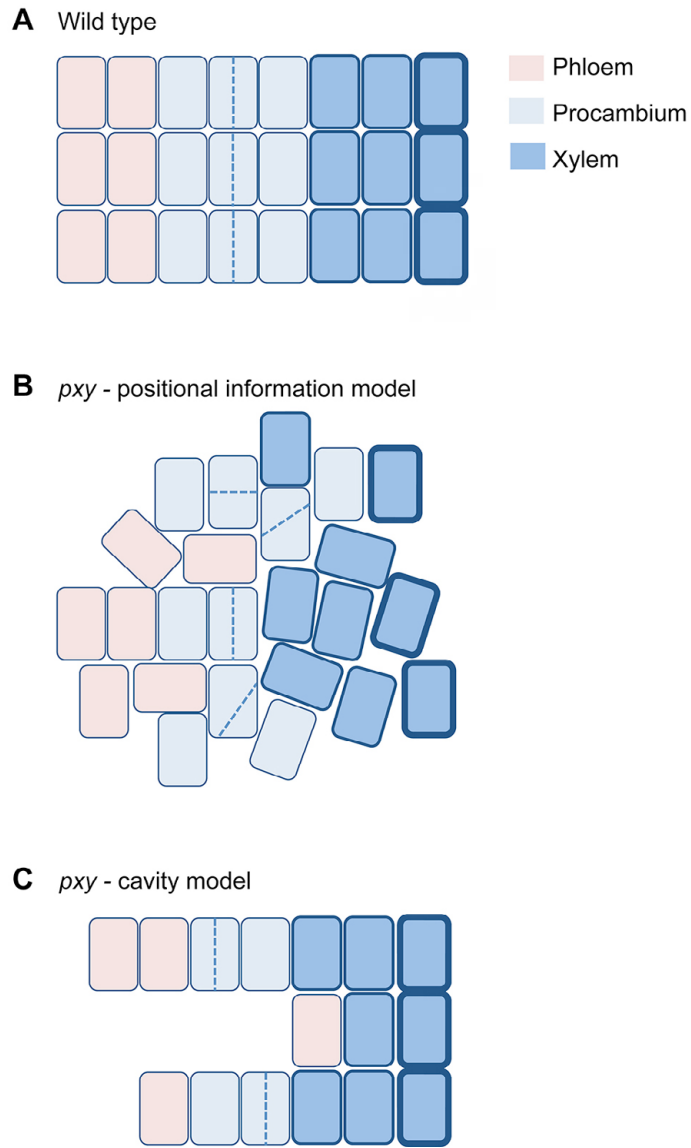

**Fig. S1. Diagrammatic representation of wild type and *pxy* mutant phenotype.** (A) Wild-type vascular organisation with oriented vascular cell divisions (dashed lines) in procambium cells (light blue) parallel to the tangential axis of the plant. (B) Localised ligand model of the *pxy* mutant phenotype suggested by Fisher and Turner (Fisher and Turner, 2007). PXY interprets ligand-derived positional information leading to oriented cell divisions in wild type. Failure to interpret positional information in *pxy* mutants results in cell divisions that lack orientation, leading to intercalation of xylem and phloem. (C) Cavity model of the *pxy* mutant phenotype. Differentiation of procambium cells into xylem leads to intercalation of xylem and phloem as cell division ceases in some cell files.

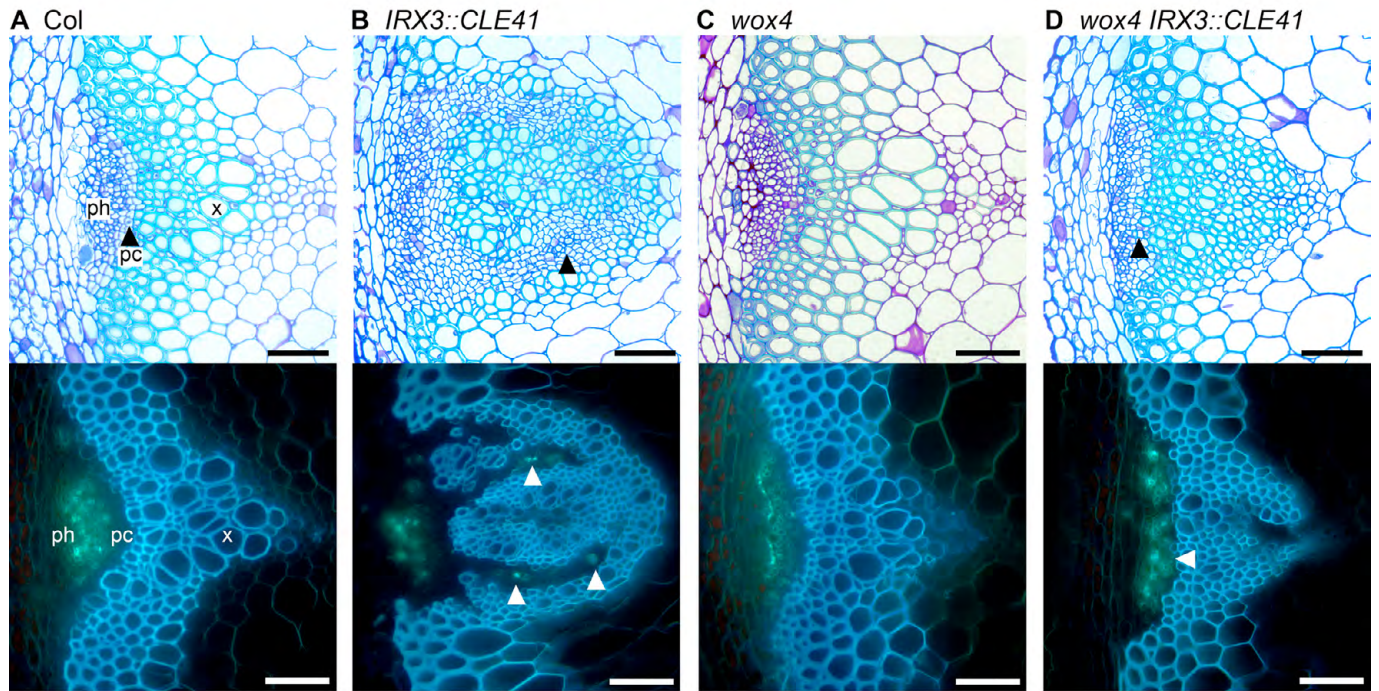

**Fig. S2. Inflorescence stem phenotype of *wox4 IRX3::CLE41* lines.** (A-D) Transverse sections of vascular tissue from 8-week-old wild-type (A), *IRX3::CLE41* (B), *wox4* (C), *wox4 IRX3::CLE41* (D) plants. Upper panels show Toluidine Blue-stained thin sections. Lower panels are Aniline Blue-stained hand sections viewed under a UV light (sieve plates in phloem fluoresce green). Scale bars: 50  $\mu$ m. ph, phloem; pc, procambium (arrowhead in A); x, xylem. Arrowheads in B,D indicate adjacent or intercalated xylem and phloem.

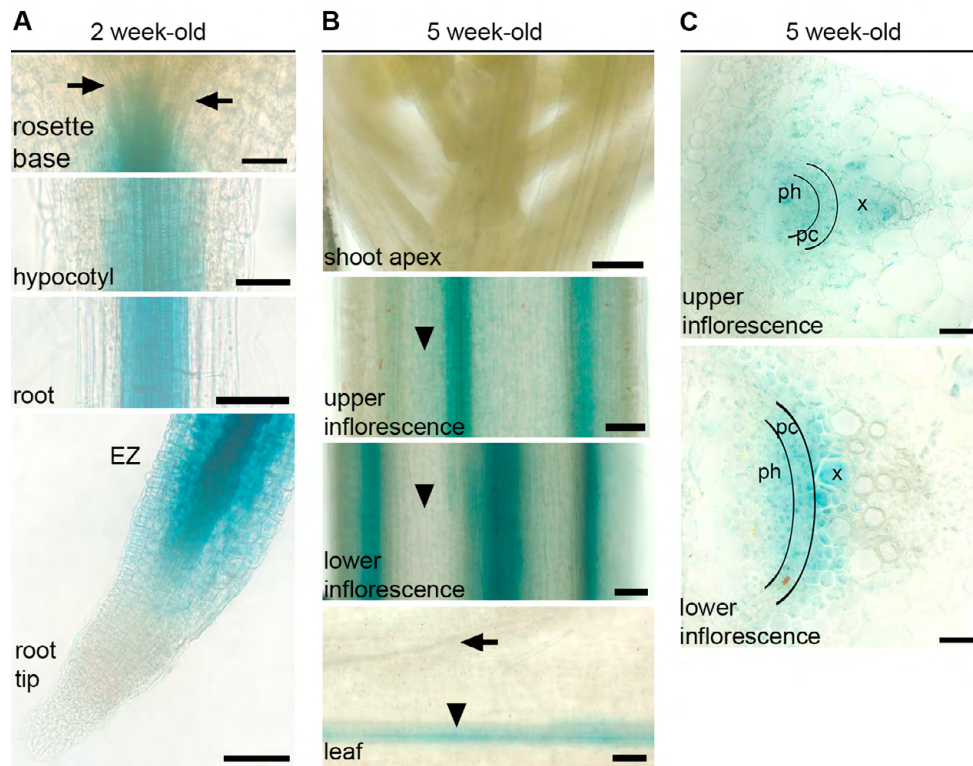

**Fig. S3. GUS staining in *WOX14::GUS* plants.** (A) Seedling subjected to GUS staining, 2 weeks post-germination. Arrows in upper panel show staining where rosette leaves meet the stem. The root elongation zone (EZ) coincides with initiation of GUS staining in the root (lower panel). (B) Five-week-old *WOX14::GUS* plants subjected to GUS staining. Arrowheads in middle panels mark tissue between inflorescence stem vascular bundles. In the lower panel, the arrowhead marks the midvein of a fully expanded leaf and a secondary vein with no staining is also marked (arrow). (C) Hand sections of *WOX14::GUS* stained stem. Upper panel shows section 2 cm below the shoot apex; lower panel shows section 1 cm above the rosette. The phloem (ph), procambium (pc) and xylem (x) are marked. Scale bars: 100  $\mu$ m in A,B; 25  $\mu$ m in C.

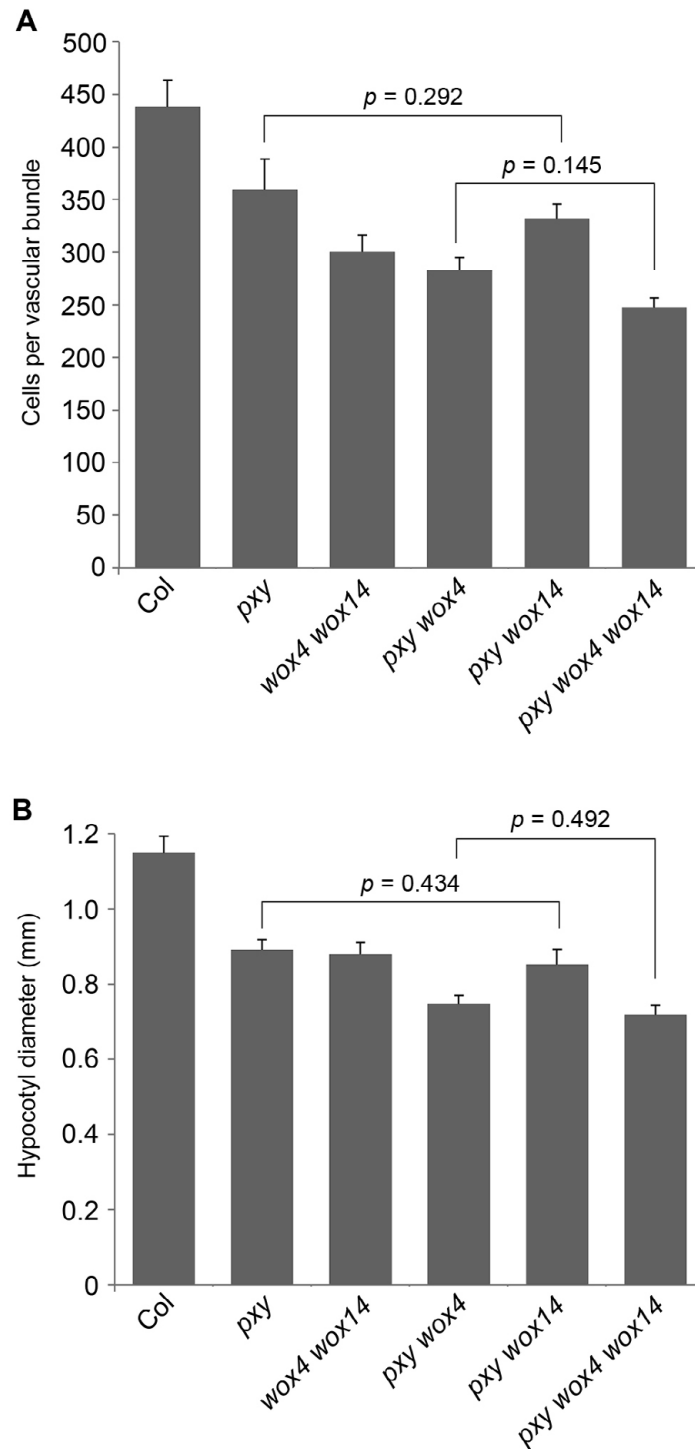

**Fig. S4. *WOX14* is epistatic to *PXY*.** (A) Mean number of cells per vascular bundle in *pxy wox14* and *pxy wox4 wox14* lines. (B) Mean hypocotyl diameter of *pxy wox14* and *pxy wox4 wox14* plants. In both A and B, *pxy wox14* is unchanged from *pxy*, and *pxy wox4 wox14* shows no difference from *pxy wox4*. *P* values were determined using ANOVA with an LSD post-hoc test. Error bars indicate s.e.m.

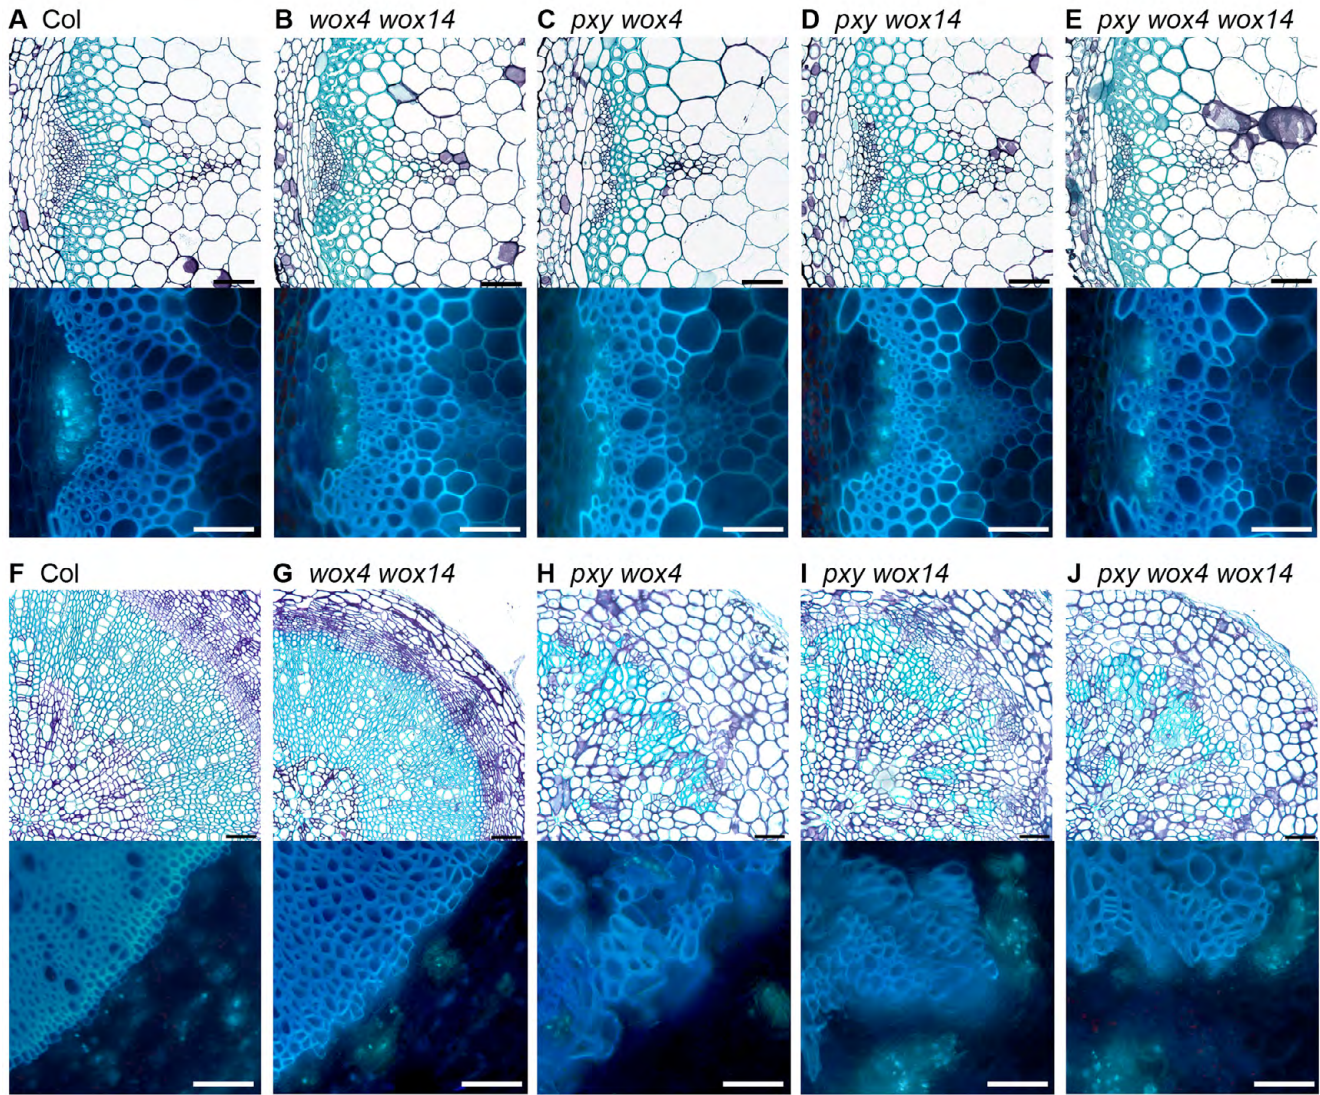

**Fig. S5. Phenotype of *pxy vox4 vox14* plants.** (A-E) Toluidine Blue-stained thin sections (upper panels); Analine Blue-stained hand sections (lower panels) of Col (A), *vox4 vox14* (B), *pxy vox4* (C), *pxy vox14* (D) and *pxy vox4 vox14* (E) 8-week-old inflorescence stem vascular tissue. (F-J) Toluidine Blue- (upper) and Analine Blue (lower)-stained sections of Col (F), *vox4 vox14* (G), *pxy vox4* (H), *pxy vox14* (I) and *pxy vox4 vox14* (J) hypocotyl vascular tissue. Scale bars: 50  $\mu$ m.

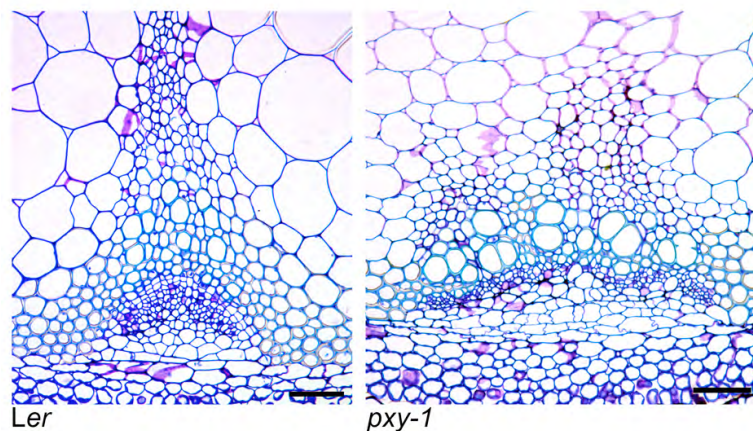

**Fig. S6. Phenotype of *pxy-1* *Ler* allele.** Vascular bundles from *Ler* (left hand panel) and *pxy-1* (right hand panel). *pxy-1* appears more disrupted than Col *pxy* alleles (compare with Fig. 9A). Scale bars: 50  $\mu$ m.

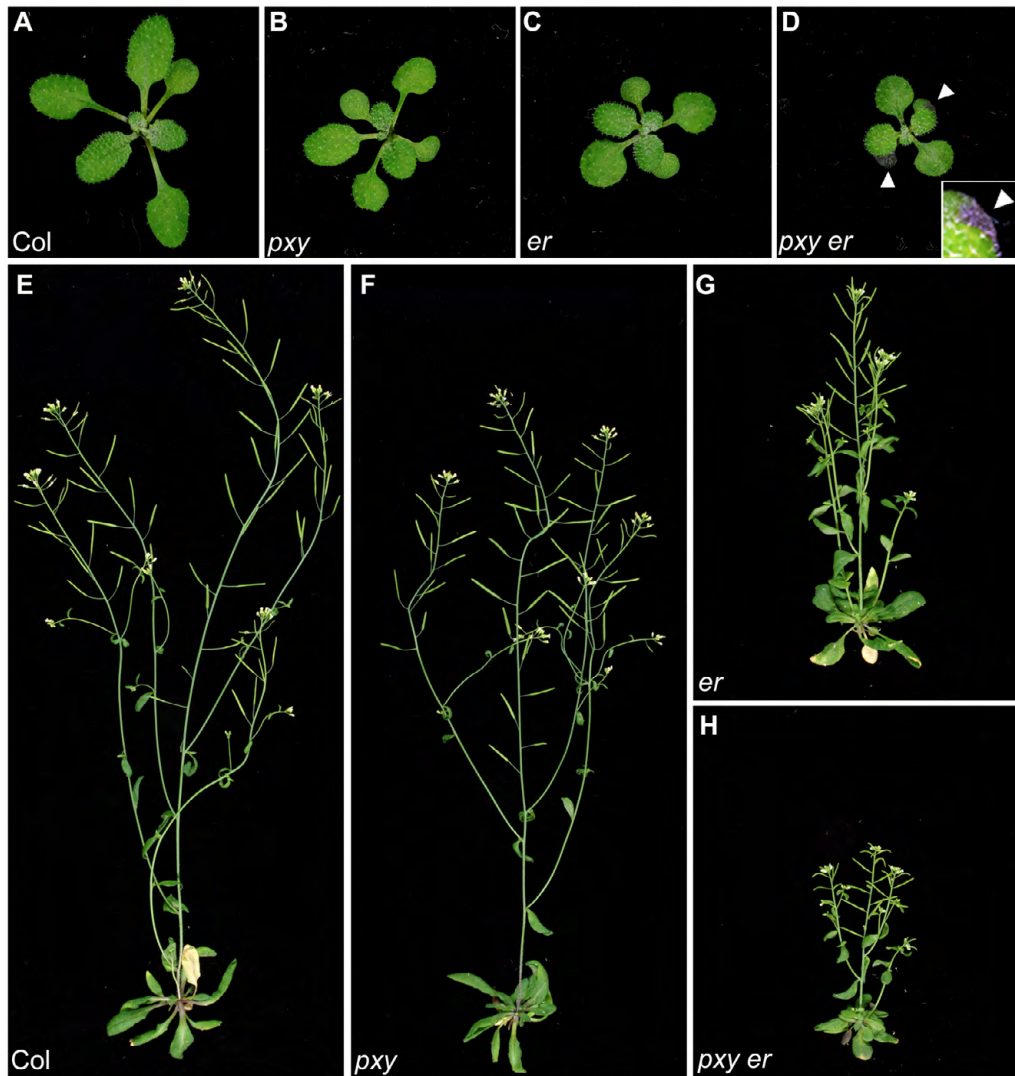

**Fig. S7. Morphology of *pxy er* plants compared to single mutants and wild type.** (A-D) Rosettes from 3-week old Col (A), *pxy* (B), *er* (C) and *pxy er* (D) plants. Arrowheads in D indicate anthacyanin accumulation in cotyledons (also shown magnified inset). (E-H) Gross morphology of Col (E), *pxy* (F), *er* (G) and *pxy er* (H) 8 week old plants. Scale bars: 50  $\mu$ m.

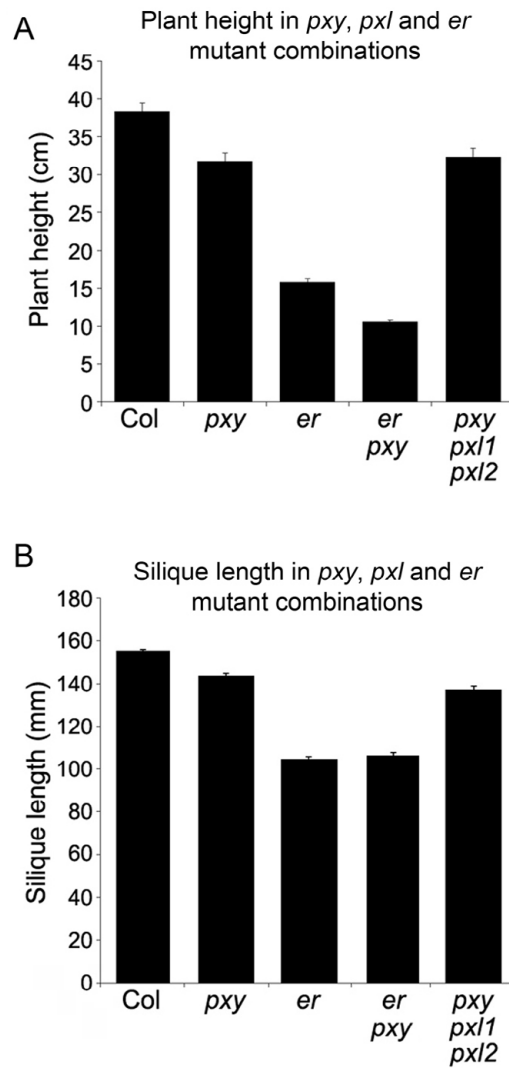

**Fig. S8. *pxy er* plant height and silique length.** (A) Graph showing mean height of 8 week old Col, *pxy*, *er*, *pxy er* and *pxy pxl1 pxl2* plants. (B) Graph showing mean length of mature Col, *pxy*, *er*, *pxy er* and *pxy pxl1 pxl2* siliques.

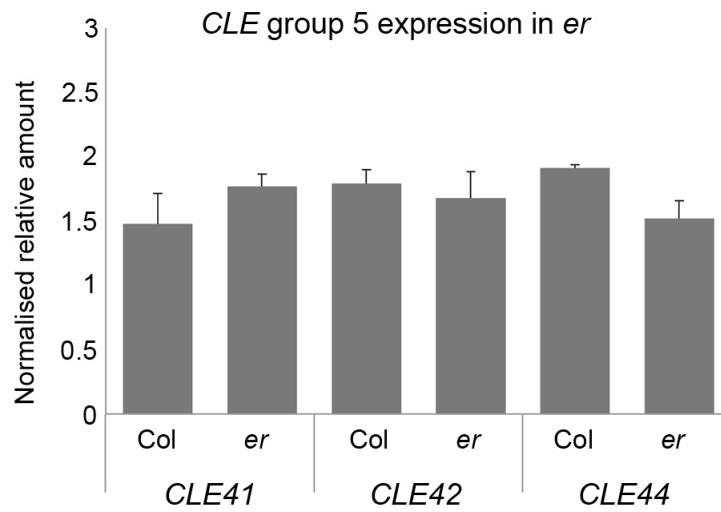

**Fig. S9. *CLE41*, *CLE42* and *CLE44* expression in wild type and *er* mutants.** qRT-PCR showing *CLE41*, *CLE42* and *CLE44* inflorescence expression normalised to *ACT2* in 5-week-old Col and *er* plants. Samples were measured in technical triplicates on biological triplicates. Error bars indicate s.e.m.

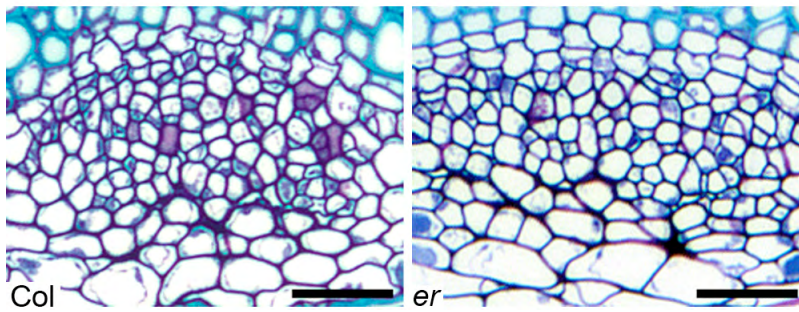

**Fig. S10. Wild-type and *er* phloem are indistinguishable.** Wild type (LHS) and *er* (RHS) phloem.

**Table S1. Oligonucleotides used in this manuscript**

| Oligo name                 | Oligo sequence           |
|----------------------------|--------------------------|
| <b>GENOTYPING</b>          |                          |
| Salk_LBa1                  | TGGTTCACGTAGTGGGCCATCG   |
| GABI-LB                    | ATATTGACCATCATACTCATTGC  |
| pxy-3f                     | CCCCACACAAAAACCATAATG    |
| pxy-3r                     | AAAAATCGAGAAGCTTGAGGG    |
| pxy-5f                     | GGCATTGTGTGATTTGGTTTC    |
| pxy-5r                     | AGCTGCTGGAATCTCTCCTTC    |
| wox4-1 LP                  | TTTTTAGCGTGGTTCATGTCC    |
| wox4-1 RP                  | CATTTTTCCCTTCGATTTTCC    |
| GK-wox14-F                 | TGAATACCGTCGACCAAAATC    |
| GK-wox14-R                 | GAAGCTGTGTTGAAGTCGGAG    |
| IRX3prom-F                 | TGAGAGAGACCTGCAAAGGA     |
| CLE41R-IRX3promComp        | TTCGAGGAGAACCCTCTTGA     |
| <b>QUANTITATIVE RT-PCR</b> |                          |
| qRT-wox4f                  | TCACGACCACTGGTGTCTTT     |
| qRT-wox4r                  | CCCAGCTCCTACATGTCCTC     |
| qRT-WOX14F                 | AAACGAAAGCAGCCTCAAAC     |
| qRT-WOX14R                 | CCCTGAATCTCCACAACCTC     |
| qCLE41f                    | TCAAGAGGGTTCTCCTCGAA     |
| qCLE41r                    | TGTGCTAGCCTTTGGACGTA     |
| qCLE42f                    | ACTTCGCCTGAAGGGAAAAG     |
| qCLE42r                    | ATTGGCACCGATCATCTTTC     |
| qCLE44f                    | TTTGGACCACTTGGAACCTC     |
| qCLE44r                    | ACGCAGTGGCACTTCTTCTT     |
| qACT2f                     | GCCATCCAAGCTGTTCTCTC     |
| qACT2r                     | ACCCTCGTAGATTGGCACAG     |
| 18s rRNAf                  | CATCAGCTCGCGTTGACTAC     |
| 18s rRNAr                  | GATCCTTCCGCAGGTTCAC      |
| <b>CLONING</b>             |                          |
| WOX14promF                 | CACCAAAGGTGCTGCTAAAGA    |
| WOX14promR                 | TGAACAAGACAATGAGAAAGTGAA |
| WOX14probeF                | TACGCCGTTATTTGTGACCA     |
| WOX14probeR                | GCCTGACCATTAGCTGTCGT     |
